# Supplementary material
Source: Springer Nature journal article supplement (https://www.springermedizin.de/resource/supplementary/12885_2013_4284_MOESM4_ESM.pdf/9466820)

SATDAV mean scores by age

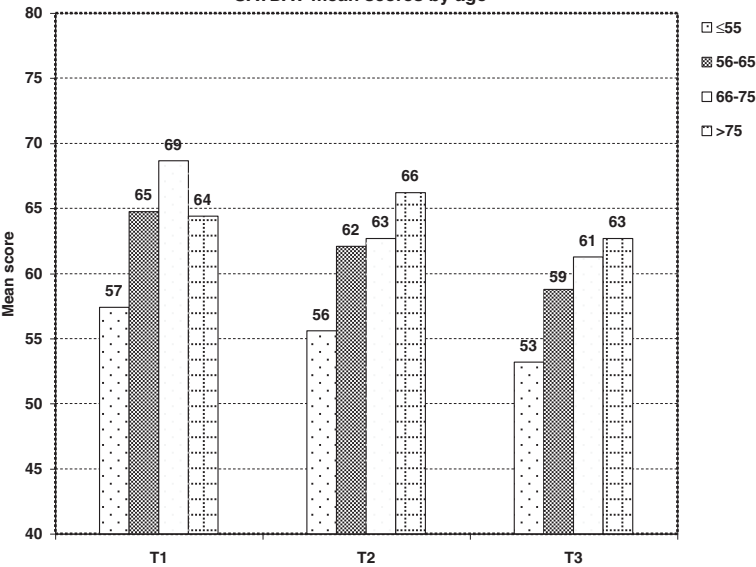

SATPE mean scores by age

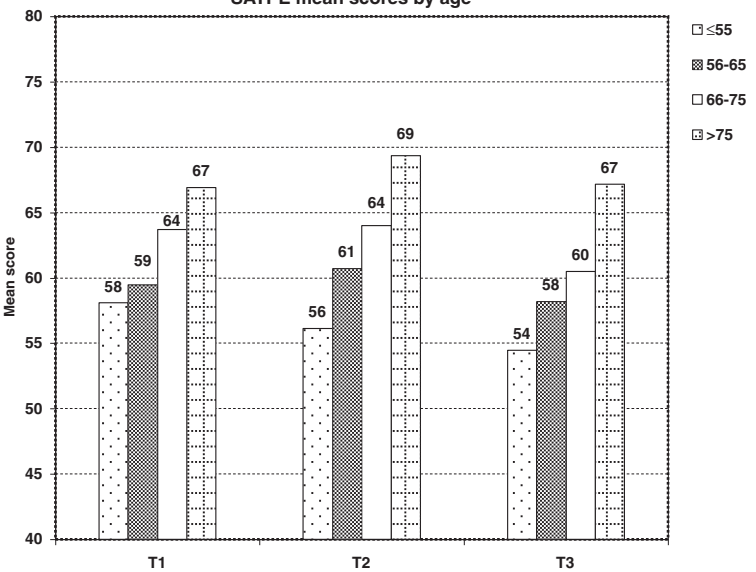

Supplement: MOESM4 [file 9466820]
